# Supplementary material for: Synthesis and Ultrafast Broadband Optical Limiting Properties of a Two-Branched Twistacene
Source: MDPI journal article supplement (doi:10.3390/molecules27113564), 2022-06-01
Supplement: s1 [file s1]

Supplementary Materials

# Synthesis and Ultrafast Broadband Optical Limiting Properties of a Two-Branched Twistacene

Yanbing Han <sup>1</sup>, Jinchong Xiao <sup>2</sup>, Xingzhi Wu <sup>3</sup>, Yuxiao Wang <sup>1</sup>, Xueru Zhang <sup>1</sup> and Yinglin Song <sup>1,\*</sup>

<sup>1</sup> Department of Physics, Harbin Institute of Technology, Harbin 150001, China;

hanyanbing1990@126.com (Y.H.); wangyx@hit.edu.cn (Y.W.); xrzhang@hit.edu.cn (X.Z.)

<sup>2</sup> Key Laboratory of Chemical Biology of Hebei Province, College of Chemistry and Environmental Science, Hebei University, Baoding 071002, China; jcxiaoicas@163.com

<sup>3</sup> Jiangsu Key Laboratory of Micro and Nano Heat Fluid Flow Technology and Energy Application, School of Physical Science and Technology, Suzhou University of Science and Technology, Suzhou 215009, China; wuxingzhi@usts.edu.cn

\* Correspondence: ylsong@hit.edu.cn

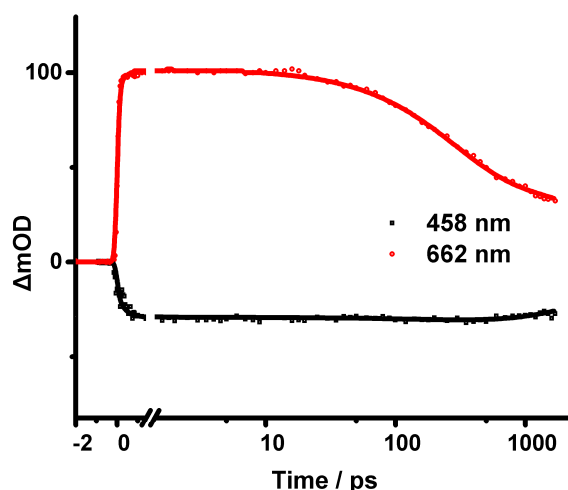

**Figure S1.** Dynamics traces of PyDN at 458 nm and 662 nm. The dots represent the experimental data and solid lines were theoretical fitted curves by global analysis.

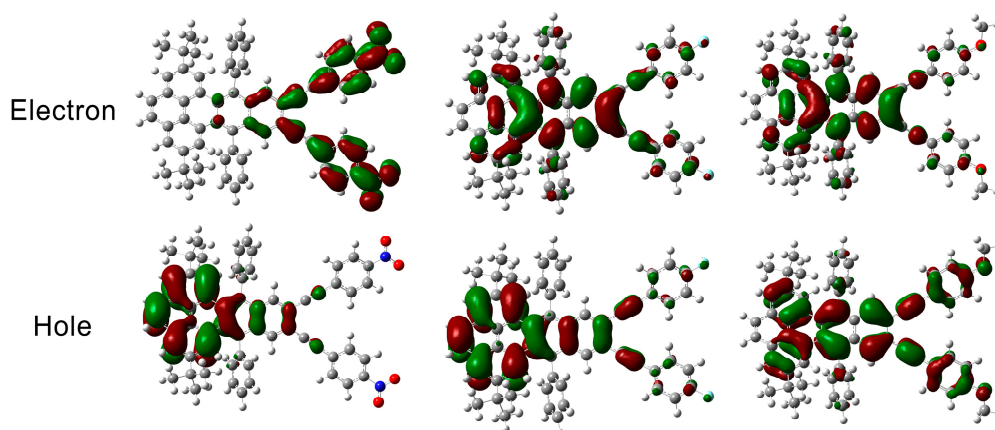

**Figure S2.** The natural transition orbitals in the first excited state ( $S_1$ ) of designed twistacenes.

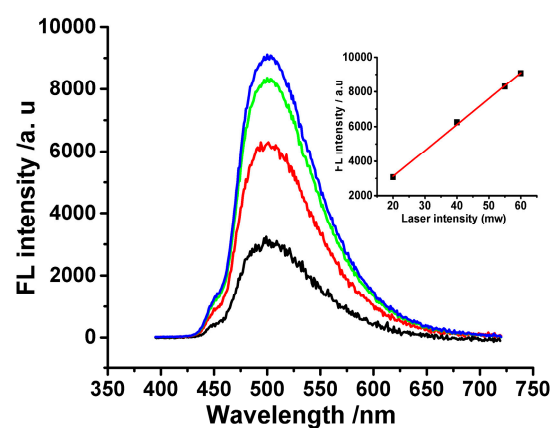

**Figure S3.** The emission spectra of PyDN in toluene under different incident laser energies at 400 nm. Inset is that linear dependence of one-photon-excited fluorescence intensity on the laser intensity.

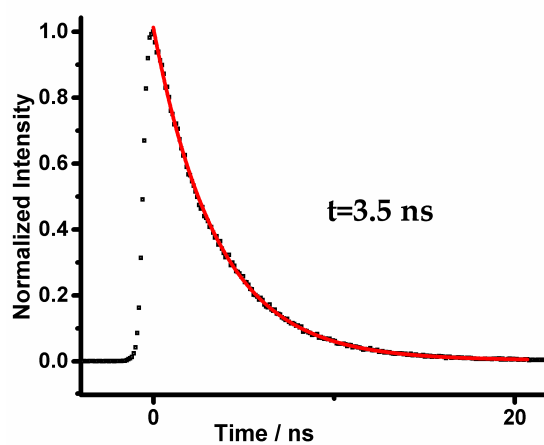

**Figure S4.** Fluorescence decay of PyDN in toluene. The solid line was fitted lifetime of 3.5 ns.

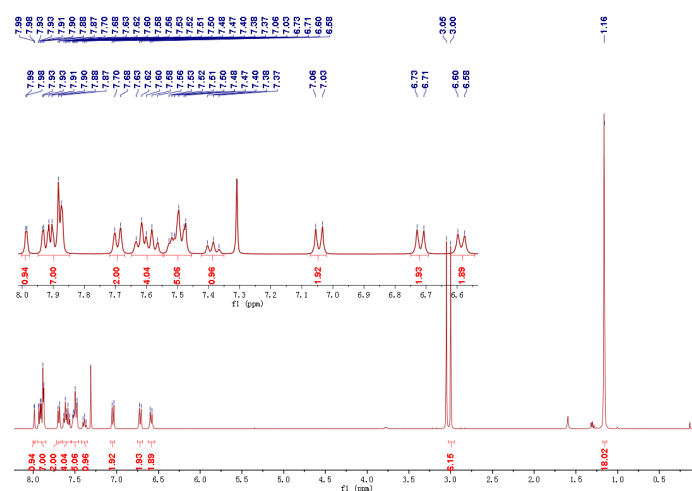

**Figure S5.**  $^1\text{H}$  NMR spectrum of PyDN.

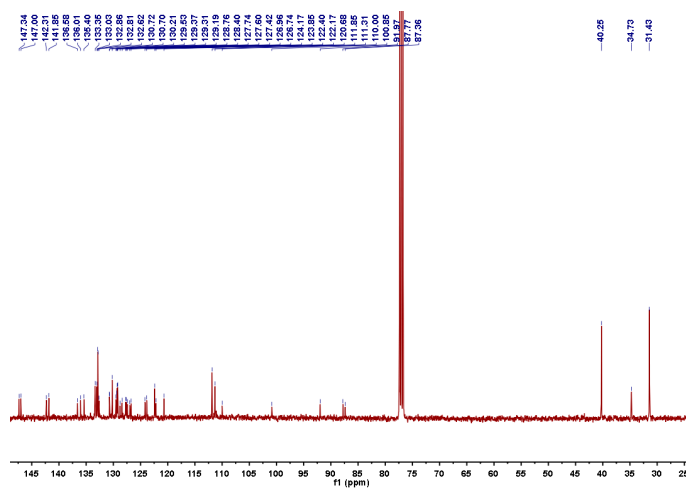

Figure S6.  $^{13}\text{C}$  NMR spectrum of PyDN.

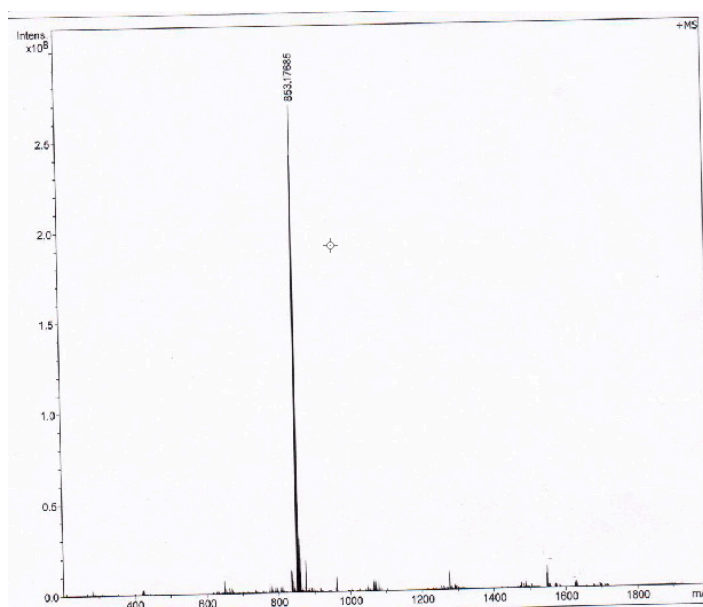

Figure S7. MALDI-TOF spectrum of PyDN.
